# Supplementary material for: Acute gastroenteritis in primary care: a longitudinal study in the Swiss Sentinel Surveillance Network, Sentinella
Source: Springer Nature journal article supplement (doi:10.1007/s15010-017-1049-5), 2017-08-04
Supplement: MOESM1 [file 13349884]

## Acute gastroenteritis in primary care: a longitudinal study in the Swiss Sentinel Surveillance Network, Sentinella

*Infection*

Claudia Schmutz<sup>1, 2\*</sup>, Philipp Justus Bless<sup>1, 2\*</sup>, Daniel Mäusezahl<sup>1, 2†</sup>, Marianne Jost<sup>3</sup>,  
Mirjam Mäusezahl-Feuz<sup>3</sup>, Swiss Sentinel Surveillance Network

\* These authors contributed equally to this paper

† Corresponding author

<sup>1</sup> Swiss Tropical and Public Health Institute, Socinstrasse 57, P.O. Box, 4002 Basel, Switzerland

<sup>2</sup> University of Basel, Petersplatz 1, P.O. Box, 4001 Basel, Switzerland

<sup>3</sup> Federal Office of Public Health, Schwarzenburgstrasse 157, 3003 Bern, Switzerland

**Corresponding author:** Dr. Daniel Mäusezahl

Address: Swiss Tropical and Public Health Institute  
Socinstrasse 57  
P.O. Box  
4002 Basel  
Switzerland

E-mail address: daniel.maeusezahl@swisstph.ch

DOI: 10.1007/s15010-017-1049-5

**Weekly questionnaire – part on acute gastroenteritis**

|                                                                      |                           |                                                                                                 |                                                 |                              |                          |                          |                          |                          |                          |                          |                          |                          |                          |                          |                          |                          |
|----------------------------------------------------------------------|---------------------------|-------------------------------------------------------------------------------------------------|-------------------------------------------------|------------------------------|--------------------------|--------------------------|--------------------------|--------------------------|--------------------------|--------------------------|--------------------------|--------------------------|--------------------------|--------------------------|--------------------------|--------------------------|
| <b>SENTINELLA 2014</b><br>Meldekriterien auf der Rückseite beachten! | Erkrankungs-<br>meldungen | Arzt (Code) <input type="text"/> <input type="text"/> <input type="text"/> <input type="text"/> | Woche <input type="text"/> <input type="text"/> | Formular-Nr.<br><b>99999</b> |                          |                          |                          |                          |                          |                          |                          |                          |                          |                          |                          |                          |
|                                                                      | <b>Seite 2</b>            |                                                                                                 |                                                 |                              |                          |                          |                          |                          |                          |                          |                          |                          |                          |                          |                          |                          |
| <b>Akute Gastroenteritis</b>                                         |                           |                                                                                                 |                                                 |                              |                          |                          |                          |                          |                          |                          |                          |                          |                          |                          |                          |                          |
| Patienten-Nummer                                                     | 1                         | 2                                                                                               | 3                                               | 4                            | 5                        | 6                        | 7                        | 8                        | 9                        | 10                       | 11                       | 12                       | 13                       | 14                       | 15                       | 16                       |
| Geboren: Tag                                                         | <input type="text"/>      | <input type="text"/>                                                                            | <input type="text"/>                            | <input type="text"/>         | <input type="text"/>     | <input type="text"/>     | <input type="text"/>     | <input type="text"/>     | <input type="text"/>     | <input type="text"/>     | <input type="text"/>     | <input type="text"/>     | <input type="text"/>     | <input type="text"/>     | <input type="text"/>     | <input type="text"/>     |
| Monat                                                                | <input type="text"/>      | <input type="text"/>                                                                            | <input type="text"/>                            | <input type="text"/>         | <input type="text"/>     | <input type="text"/>     | <input type="text"/>     | <input type="text"/>     | <input type="text"/>     | <input type="text"/>     | <input type="text"/>     | <input type="text"/>     | <input type="text"/>     | <input type="text"/>     | <input type="text"/>     | <input type="text"/>     |
| Jahr                                                                 | <input type="text"/>      | <input type="text"/>                                                                            | <input type="text"/>                            | <input type="text"/>         | <input type="text"/>     | <input type="text"/>     | <input type="text"/>     | <input type="text"/>     | <input type="text"/>     | <input type="text"/>     | <input type="text"/>     | <input type="text"/>     | <input type="text"/>     | <input type="text"/>     | <input type="text"/>     | <input type="text"/>     |
| Geschlecht (m=1, w=2)                                                | <input type="checkbox"/>  | <input type="checkbox"/>                                                                        | <input type="checkbox"/>                        | <input type="checkbox"/>     | <input type="checkbox"/> | <input type="checkbox"/> | <input type="checkbox"/> | <input type="checkbox"/> | <input type="checkbox"/> | <input type="checkbox"/> | <input type="checkbox"/> | <input type="checkbox"/> | <input type="checkbox"/> | <input type="checkbox"/> | <input type="checkbox"/> | <input type="checkbox"/> |
| Erregernachweis im Stuhl<br>veranlasst (ja=1, nein=2)                | <input type="checkbox"/>  | <input type="checkbox"/>                                                                        | <input type="checkbox"/>                        | <input type="checkbox"/>     | <input type="checkbox"/> | <input type="checkbox"/> | <input type="checkbox"/> | <input type="checkbox"/> | <input type="checkbox"/> | <input type="checkbox"/> | <input type="checkbox"/> | <input type="checkbox"/> | <input type="checkbox"/> | <input type="checkbox"/> | <input type="checkbox"/> | <input type="checkbox"/> |
| Hospitalisierung (ja=1, nein=2)                                      | <input type="checkbox"/>  | <input type="checkbox"/>                                                                        | <input type="checkbox"/>                        | <input type="checkbox"/>     | <input type="checkbox"/> | <input type="checkbox"/> | <input type="checkbox"/> | <input type="checkbox"/> | <input type="checkbox"/> | <input type="checkbox"/> | <input type="checkbox"/> | <input type="checkbox"/> | <input type="checkbox"/> | <input type="checkbox"/> | <input type="checkbox"/> | <input type="checkbox"/> |

**Sentinella – Supplementary questionnaire on acute gastroenteritis****Sentinella – Ergänzungsfragebogen – Akute Gastroenteritis**

Arzt-Code: \_\_\_\_\_

Meldewoche: \_\_\_\_\_

Formularnummer: \_\_\_\_\_

Patientennummer: \_\_\_\_\_

**PATIENTENINFORMATION**

1. Geburtsdatum: \_\_\_\_\_/\_\_\_\_\_/\_\_\_\_\_  
 2. Geschlecht  m  w  
 3. Bezahlte Berufstätigkeit?  ja  nein

**KONSULTATIONEN**

4. Erstkonsultation Datum: \_\_\_\_\_/\_\_\_\_\_/20\_\_\_\_\_  
 5. Weitere Konsultationen? Datum: \_\_\_\_\_/\_\_\_\_\_/20\_\_\_\_\_  
 Datum: \_\_\_\_\_/\_\_\_\_\_/20\_\_\_\_\_  
 Datum: \_\_\_\_\_/\_\_\_\_\_/20\_\_\_\_\_  
 keine

**MANIFESTATION**

6. **Beginn** der Symptome Datum: \_\_\_\_\_/\_\_\_\_\_/20\_\_\_\_\_  
 unbekannt

7. Bitte führen Sie **alle** Symptome auf, die seit Beginn der Erkrankung bis zur Erstkonsultation aufgetreten sind.

| Symptom                                                    | Dauer <sup>1</sup> | Symptom                                   | Dauer <sup>1</sup> |
|------------------------------------------------------------|--------------------|-------------------------------------------|--------------------|
| <input type="checkbox"/> Durchfall                         | _____ Tage         | <input type="checkbox"/> Appetitlosigkeit | _____ Tage         |
| <input type="checkbox"/> mit Blutbeimengung                | _____ Tage         | <input type="checkbox"/> Übelkeit         | _____ Tage         |
| <input type="checkbox"/> mit Schleim (Mucus)               | _____ Tage         | <input type="checkbox"/> Erbrechen        | _____ Tage         |
| <input type="checkbox"/> Blähungen, Druck- und Völlegefühl | _____ Tage         | <input type="checkbox"/> Fieber >38°C     | _____ Tage         |
| <input type="checkbox"/> krampfartige Bauchschmerzen       | _____ Tage         | <input type="checkbox"/> andere: _____    | _____ Tage         |
| <input type="checkbox"/> Dehydratation                     | _____ Tage         | <input type="checkbox"/> andere: _____    | _____ Tage         |

8. **Allgemeinzustand** (AZ) nach Einschätzung des Arztes bei Erstkonsultation: Bitte kreisen Sie auf der Skala 1 bis 10 den Wert ein, der am besten den AZ des Patienten widerspiegelt.

Schlechter AZ 1 - 2 - 3 - 4 - 5 - 6 - 7 - 8 - 9 - 10 Guter AZ

**DIAGNOSTIK**

9. **Erregernachweis** in Stuhl veranlasst?  ja  nein

Falls ja, a) **Entnahmedatum** der ersten Probe Datum: \_\_\_\_\_/\_\_\_\_\_/20\_\_\_\_\_  
 unbekannt  
 Keine Probe entnommen

- b) **Hauptgrund** für die Probeentnahme: (Bitte geben Sie nur **einen** Grund an.)

|                                                                  |                                                                                      |
|------------------------------------------------------------------|--------------------------------------------------------------------------------------|
| <input type="checkbox"/> schlechter AZ                           | <input type="checkbox"/> Aufenthalt in Institution (präventiv-hygienische Abklärung) |
| <input type="checkbox"/> protrahiertes Verlaufs                  | <input type="checkbox"/> Bewohner/Patient <input type="checkbox"/> Angestellte(r)    |
| <input type="checkbox"/> Komorbidität                            | <input type="checkbox"/> berufliche Tätigkeit: welche?<br>_____                      |
| <input type="checkbox"/> Ausbruchsabklärung                      | <input type="checkbox"/> Spezifische Risikoexposition                                |
| <input type="checkbox"/> Alter (Kleinkind, betagte Person)       | <input type="checkbox"/> Auslandsaufenthalt vor Manifestationsbeginn                 |
| <input type="checkbox"/> spezifisches Symptom: welches?<br>_____ | <input type="checkbox"/> Kontakt zu anderen Erkrankten <sup>2</sup>                  |
| <input type="checkbox"/> anderer: _____                          | <input type="checkbox"/> Kontakt zu Tieren                                           |

- c) Welche **Methode** wurde verwendet?  Allg. Stuhlbakteriologie (Kultur) / Einzel-Nachweisverfahren  
 Multiplex-PCR

- d) Auf welche Erreger wurde getestet und was war das **Resultat**? (Bitte geben Sie **alle** durchgeführten Analysen an, auch bei negativem Befund, oder legen Sie eine Kopie der Laborresultate bei.)

| Erreger                                            | Befund | pos                      | neg                      | unbekannt                |
|----------------------------------------------------|--------|--------------------------|--------------------------|--------------------------|
| <input type="checkbox"/> <i>Campylobacter</i> spp. |        | <input type="checkbox"/> | <input type="checkbox"/> | <input type="checkbox"/> |
| <input type="checkbox"/> <i>Salmonella</i> spp.    |        | <input type="checkbox"/> | <input type="checkbox"/> | <input type="checkbox"/> |
| <input type="checkbox"/> <i>Shigella</i> spp.      |        | <input type="checkbox"/> | <input type="checkbox"/> | <input type="checkbox"/> |
| <input type="checkbox"/> EHEC (VTEC/STEC)          |        | <input type="checkbox"/> | <input type="checkbox"/> | <input type="checkbox"/> |
| <input type="checkbox"/> Noroviren                 |        | <input type="checkbox"/> | <input type="checkbox"/> | <input type="checkbox"/> |
| <input type="checkbox"/> Rotaviren                 |        | <input type="checkbox"/> | <input type="checkbox"/> | <input type="checkbox"/> |
| <input type="checkbox"/> andere: _____             |        | <input type="checkbox"/> | <input type="checkbox"/> | <input type="checkbox"/> |
| <input type="checkbox"/> andere: _____             |        | <input type="checkbox"/> | <input type="checkbox"/> | <input type="checkbox"/> |

<sup>1</sup> Falls unbekannt, schreiben Sie bitte „N/A“ in das Feld

<sup>2</sup> Kontakt zu anderen an akuter Gastroenteritis Erkrankten

**VERLAUF**10. **Arbeitsunfähigkeit**<sup>3</sup>?  ja  nein  unbekanntFalls ja, a) Warum?  wegen Symptomen  wegen Übertragungsrisiko im Beruf  
 wegen Krankheit des Kindes

b) Wie lange? von Datum: \_\_\_\_/\_\_\_\_/20\_\_\_\_ bis Datum: \_\_\_\_/\_\_\_\_/20\_\_\_\_

11. **Komplikationen**?  ja, welche? \_\_\_\_\_  nein  unbekannt12. **Hospitalisation**?  ja, Datum Eintritt: \_\_\_\_/\_\_\_\_/20\_\_\_\_  nein  unbekannt  
Grund? \_\_\_\_\_13. **Tod**?  ja, Datum: \_\_\_\_/\_\_\_\_/20\_\_\_\_  nein**THERAPIE**14. **Antibiotikagabe**?  ja, Datum Therapiebeginn: \_\_\_\_/\_\_\_\_/20\_\_\_\_  neinFalls ja, a) **Hauptgrund** für die Antibiotikagabe? (*Bitte geben Sie nur einen Grund an.*)

|                                                              |                                                                              |
|--------------------------------------------------------------|------------------------------------------------------------------------------|
| <input type="checkbox"/> bakteriell bedingte Gastroenteritis | <input type="checkbox"/> hohes, protrahiertes Fieber (systemische Infektion) |
| <input type="checkbox"/> immunsupprimierte Person            | <input type="checkbox"/> Dauer der Erkrankung                                |
| <input type="checkbox"/> Polymorbidität                      | <input type="checkbox"/> „sicherheitshalber“                                 |
| <input type="checkbox"/> schlechter AZ                       | <input type="checkbox"/> spezifisches Symptom, welches? _____                |
| <input type="checkbox"/> fordernde Haltung des Patienten     | <input type="checkbox"/> anderer: _____                                      |

b) Welches **Antibiotikum**? (*Bitte geben Sie alle verschriebenen Antibiotika an.*)

| Stoffklasse                                           | Name/Dosierung/Dauer |
|-------------------------------------------------------|----------------------|
| <input type="checkbox"/> Aminopenicillin              | _____                |
| <input type="checkbox"/> mit Clavulansäure            | _____                |
| <input type="checkbox"/> Cephalosporin                | _____                |
| <input type="checkbox"/> Chinolon                     | _____                |
| <input type="checkbox"/> Makrolid                     | _____                |
| <input type="checkbox"/> Metronidazol                 | _____                |
| <input type="checkbox"/> Trimethoprim+Sulfamethoxazol | _____                |
| <input type="checkbox"/> Tetrazyklin                  | _____                |
| <input type="checkbox"/> Andere                       | _____                |

15. **Andere** verschriebene Therapie?  ja  neinFalls ja, a) welche **Therapie**? (*Mehrere Antworten möglich*):

|                                              |                                                                          |                                       |
|----------------------------------------------|--------------------------------------------------------------------------|---------------------------------------|
| <input type="checkbox"/> Flüssigkeitsersatz: | <input type="checkbox"/> per oral: viel Flüssigkeit (Tee, Bouillon etc.) | <input type="checkbox"/> Antiemetika  |
|                                              | <input type="checkbox"/> per oral: Elektrolytlösung                      | <input type="checkbox"/> Analgetika   |
|                                              | <input type="checkbox"/> per Infusion                                    | <input type="checkbox"/> Probiotika   |
| <input type="checkbox"/> Antidiarrhoika      |                                                                          | <input type="checkbox"/> Spasmolytika |
| <input type="checkbox"/> andere: _____       |                                                                          |                                       |

**EXPOSITION**16. **Auslandaufenthalt** (mind. 1 Übernachtung) in den 7 Tagen vor Manifestationsbeginn?  ja  nein  
 unbekannt

Falls ja, a) wo (Land)? \_\_\_\_\_

Aufenthalt von Datum: \_\_\_\_/\_\_\_\_/20\_\_\_\_ bis Datum: \_\_\_\_/\_\_\_\_/20\_\_\_\_

17. **Lebensmittel und andere Expositionen** in den 7 Tagen vor Manifestationsbeginn?

| Exposition                               | Ja                       | Nein                     | Pat. weiss nicht         | unbekannt                |
|------------------------------------------|--------------------------|--------------------------|--------------------------|--------------------------|
| a) Geflügelfleisch konsumiert?           | <input type="checkbox"/> | <input type="checkbox"/> | <input type="checkbox"/> | <input type="checkbox"/> |
| b) Rohmilchprodukte konsumiert?          | <input type="checkbox"/> | <input type="checkbox"/> | <input type="checkbox"/> | <input type="checkbox"/> |
| c) Eier konsumiert?                      | <input type="checkbox"/> | <input type="checkbox"/> | <input type="checkbox"/> | <input type="checkbox"/> |
| d) Mahlzeit im Restaurant / „auswärts“ ? | <input type="checkbox"/> | <input type="checkbox"/> | <input type="checkbox"/> | <input type="checkbox"/> |
| e) Kontakt zu Erkrankten <sup>4</sup> ?  | <input type="checkbox"/> | <input type="checkbox"/> | <input type="checkbox"/> | <input type="checkbox"/> |
| f) Berufliche Exposition? Beruf: _____   | <input type="checkbox"/> | <input type="checkbox"/> | <input type="checkbox"/> | <input type="checkbox"/> |

<sup>3</sup> Einschliesslich Eltern, die wegen Krankheit des Kindes der Arbeit fern bleiben müssen<sup>4</sup> Kontakt zu anderen an akuter Gastroenteritis Erkrankten
